# Supplementary material
Source: publisher figshare collection journal article supplement (https://acs.figshare.com/ndownloader/files/5815815)
Supplement: Supplementary file 1 [file 5815815]

Table 4: Coupling Strength for the Adjusted Empirical Force Field

[illegible]

Table 5: Coupling Strength for the *Ab Initio* Force Field[illegible]
